# Supplementary material for: Potentiometric, 1H NMR and ESI-MS investigation on dimethyltin(iv) cation–mercaptocarboxylate interaction in aqueous solution
Source: Royal Society of Chemistry journal article supplement (doi:10.1039/b908114c), 2009-01-01
Supplement: b908114c.pdf [file b908114c.pdf]

## Supplementary Information

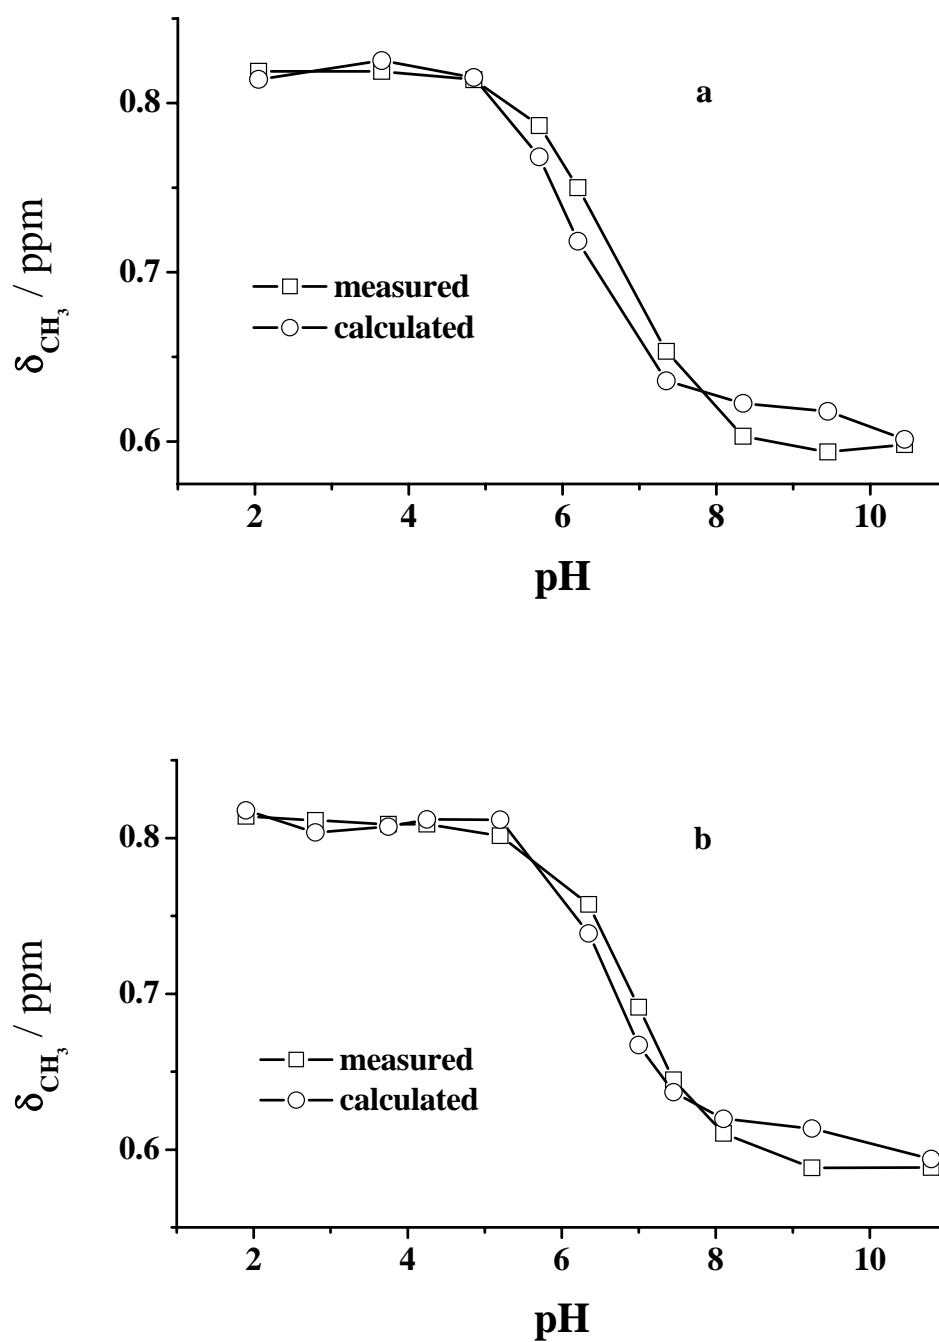

**Fig. 1S** Chemical shifts of CH<sub>3</sub> vs. pH in dimethyltin(IV):L 1:2 mixtures: (a) L = TLA; (b) L = TMA.
